# Supplementary material for: Amyloid PET Quantification Using Low-dose CT-guided Anatomic Standardization
Source: Research Square preprint supplement (doi:10.21203/rs.3.rs-643725/v1), 2021-07-27
Supplement: Supplementary file 1 [file c929628dfbab2b17aa8c45e1.xlsx]

## Sheet: Sheet1
Table 1 Significant voxel-wise differences in CT-based and MRI-based standardized PET images
	Cluster size	T-value	MNI coordinates	Location of peak voxels
	(No. of voxels)	(peak voxel)	(x, y, z)
MRI-based > CT-based	2408	11.94	2, -18, -38	Ventral brain stem
	2330	7.9	-32, 6, -24	Left temporal pole
	2335	7.08	0, -12, -8	Venral diencephalon
	1025	6.57	20, -22, 66	Right precentral gyrus
	527	6.53	-8, 24, 48	Left cerebral white matter
	621	6.27	-44, 24, 16	Left cerebral white matter
	940	6.2	42, 6, -32	Right cerebral white matter
CT-based > MRI-based	7097	12.87	0, -48, -54	Dorsal brain stem
	850	6.44	12, -62, -14	Right cerebellum exterior
	880	4.95	-56, -40, 2	Left middle temporal gyrus
	430	4.68	-28, -78, -46	Left cerebellum exterior
